# Supplementary material for: The Emergence of SARS-CoV-2 within the Dog Population in Croatia: Host Factors and Clinical Outcome
Source: MDPI journal article supplement (doi:10.3390/v13081430), 2021-07-22
Supplement: s1 [file s1]

## Supplementary data

**Table S1.** SARS-CoV-2 ELISA (enzyme-linked immunoassay) and MNT (microneutralisation test) result in different age groups among dogs living in COVID-19 positive households.

| Age (years) | Number of tested samples | Number of ELISA positive | OR <sup>a</sup> (95% CI <sup>b</sup> ) | P     | Number of MNT <sup>c</sup> positive | OR (95% CI)         | P    |
|-------------|--------------------------|--------------------------|----------------------------------------|-------|-------------------------------------|---------------------|------|
| <1          | 7                        | 1                        | 0.17 (0.01 – 0.98)                     | -     | 1                                   | 0.17 (0.01 – 0.98)  | -    |
| 1 – 4       | 22                       | 14                       | 10.5 (1.44 – 27.82)                    | 0.04* | 7                                   | 2.80 (0.37 – 58.21) | 0.38 |
| 5+          | 46                       | 18                       | 3.86 (0.59 – 76.05)                    | 0.23  | 11                                  | 1.89 (0.28 – 37.65) | 0.58 |

Note: Logistic regression was used to calculate OR with dogs under one year of age used as the reference category. <sup>a</sup>OR - odds ratio, <sup>b</sup>CI - confidence interval, \* - statistically significant

**Table S2.** Breed predisposition to SARS-CoV-2 infection.

| Clades of breeds   | Number of tested samples | Number of ELISA <sup>a</sup> positive samples (%) | Seroprevalence 95% CI <sup>b</sup> (%) | OR <sup>c</sup> | OR 95%CI    | P     |
|--------------------|--------------------------|---------------------------------------------------|----------------------------------------|-----------------|-------------|-------|
| Mix breed          | 312                      | 50 (16.03)                                        | 12.13 – 20.58                          | 0.19            | 0.14 - 0.26 | -     |
| Alpine             | 8                        | 1 (12.5)                                          | 0.32 – 52.65                           | 1.04            | 0.11 – 4.91 | 0.97  |
| American Toy       | 11                       | 0                                                 | NA                                     | 0.23            | 0 – 1.78    | 0.2   |
| Asian Spitz        | 36                       | 5 (13.89)                                         | 4.67 – 29.5                            | 0.91            | 0.31 – 2.2  | 0.84  |
| Asian Toy          | 60                       | 9 (15)                                            | 7.1 – 26.57                            | 0.96            | 0.43 – 1.96 | 0.91  |
| Continental Herder | 23                       | 9 (39.13)                                         | 19.71 – 61.46                          | 3.40            | 1.38 – 8.06 | 0.01* |
| Drover             | 12                       | 3 (25)                                            | 5.49 – 57.19                           | 1.92            | 0.47 – 6.28 | 0.34  |
| European Mastiff   | 114                      | 11 (9.65)                                         | 4.92 – 16.61                           | 0.58            | 0.28 – 1.1  | 0.1   |
| New World          | 33                       | 5 (15.15)                                         | 5.11 – 31.9                            | 1               | 0.35 – 2.45 | 0.99  |
| Pointer Setter     | 30                       | 6 (20)                                            | 7.71 – 38.57                           | 1.38            | 0.51 – 3.27 | 0.5   |
| Poodle             | 100                      | 11 (11)                                           | 5.62 – 18.83                           | 0.67            | 0.32 – 1.28 | 0.23  |
| Retriever          | 66                       | 8 (12.12)                                         | 5.38 – 22.49                           | 0.76            | 0.33 – 1.57 | 0.47  |
| Samoyed            | 8                        | 0                                                 | NA                                     | 0.31            | 0 – 2.52    | 0.33  |
| Scent Hound        | 13                       | 1 (7.69)                                          | 0.19 – 36.03                           | 0.62            | 0.07 – 2.67 | 0.57  |
| Schnauzer          | 19                       | 4 (21.05)                                         | 6.05 – 45.57                           | 1.51            | 0.45 – 4.19 | 0.48  |
| Small Spitz        | 22                       | 2 (9.09)                                          | 1.12 – 29.16                           | 0.63            | 0.12 – 2.07 | 0.48  |
| Spaniel            | 37                       | 3 (8.11)                                          | 1.7 – 21.91                            | 0.53            | 0.14 – 1.46 | 0.24  |
| Terrier            | 78                       | 10 (12.82)                                        | 6.32 – 22.32                           | 0.8             | 0.37 – 1.57 | 0.53  |
| Tibetan terrier    | 2                        | 0                                                 | NA                                     | 1.04            | 0 – 13.03   | 0.98  |
| Toy Spitz          | 13                       | 3 (23.08)                                         | 5.04 – 53.81                           | 1.73            | 0.43 – 5.56 | 0.41  |
| UK rural           | 22                       | 2 (9.09)                                          | 1.12 – 19.16                           | 0.63            | 0.12 – 2.07 | 0.48  |

Note: Breeds were grouped in phylogenetic clades [11]. For 72 samples, there was no breed data, and they were excluded from the analysis (n=997). Logistics regression was used to calculate odds ratio values with "Mix breed" as reference. <sup>a</sup>ELISA – enzyme-linked immunoassay, <sup>b</sup>CI – confidence interval, <sup>c</sup>OR – odds ratio, \* - statistically significant

**Table S3.** The interaction between age and CNS symptoms in the logistic regression model.

| Age | CNS <sup>a</sup> symptoms |                                         |                  |                                         | OR <sup>c</sup> | OR 95%CI <sup>d</sup> | P<br>(Fisher's<br>exact test) |
|-----|---------------------------|-----------------------------------------|------------------|-----------------------------------------|-----------------|-----------------------|-------------------------------|
|     | Present                   |                                         | Absent           |                                         |                 |                       |                               |
|     | No of<br>samples          | No of<br>ELISA <sup>b</sup><br>positive | No of<br>samples | No of<br>ELISA <sup>b</sup><br>positive |                 |                       |                               |
| <1  | 1                         | 0                                       | 46               | 3                                       | 4.14            | 0.14 – 121.78         | 1                             |
| 1   | 7                         | 1                                       | 67               | 12                                      | 0.76            | 0.08 – 6.94           | 1                             |
| 2   | 4                         | 0                                       | 57               | 9                                       | 0.46            | 0.02 – 9.11           | 0.58                          |
| 3   | 6                         | 1                                       | 56               | 9                                       | 1.04            | 0.11 – 10.03          | 1                             |
| 4   | 0                         | 0                                       | 51               | 8                                       | 5.12            | 0.09 – 276.15         | 1                             |
| 5   | 4                         | 0                                       | 45               | 11                                      | 0.33            | 0.02 – 6.68           | 0.56                          |
| 6   | 7                         | 4                                       | 47               | 8                                       | 6.5             | 1.21 – 34.85          | 0.04*                         |
| 7   | 7                         | 1                                       | 80               | 9                                       | 1.31            | 0.14 – 12.2           | 0.59                          |
| 8   | 5                         | 0                                       | 47               | 4                                       | 0.88            | 0.04 – 18.62          | 1                             |
| 9   | 4                         | 1                                       | 64               | 7                                       | 2.71            | 0.25 – 29.78          | 0.4                           |
| 10  | 1                         | 1                                       | 72               | 11                                      | 16.04           | 0.61 – 418.75         | 0.1                           |
| 11  | 2                         | 2                                       | 81               | 5                                       | 69.55           | 2.96 – 1634.71        | 0.01*                         |
| 12  | 2                         | 1                                       | 63               | 9                                       | 6               | 0.34 – 104.79         | 0.29                          |
| 13  | 3                         | 1                                       | 37               | 5                                       | 6.4             | 0.34 – 119.58         | 0.29                          |
| 14  | 1                         | 0                                       | 39               | 1                                       | 8.56            | 0.24 – 310.72         | 1                             |
| 15+ | 5                         | 2                                       | 34               | 6                                       | 3.11            | 0.42 – 22.87          | 0.27                          |

Note: <sup>a</sup>CNS – central nervous system, <sup>b</sup>ELISA – enzyme-linked immunoassay, <sup>c</sup>OR- odds ratio, <sup>d</sup>CI - confidence interval.

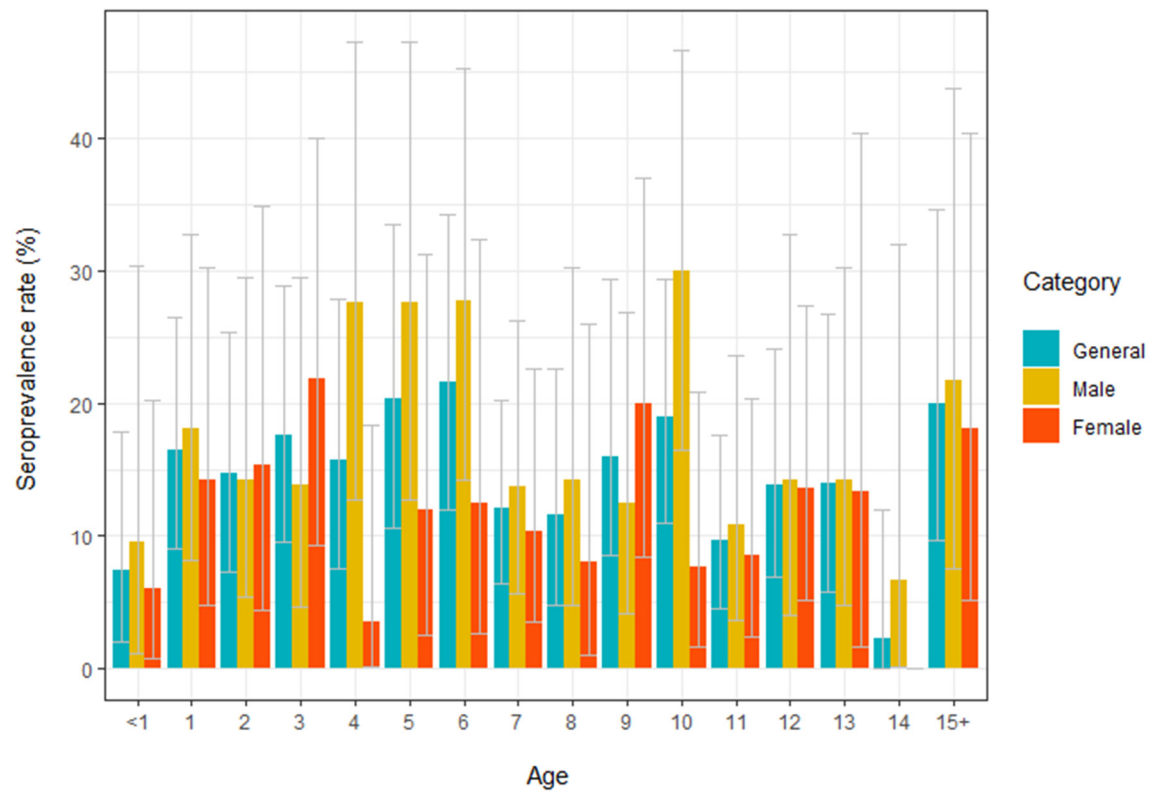

**Figure S1. Age and sex distribution of SARS-CoV-2 ELISA positive dogs.** Error bars represent a 95% confidence interval.
